# Supplementary material
Source: PubMed Central journal article supplement (PMC5233427)
Supplement: NIHMS829414-supplement.pdf [file NIHMS829414-supplement.pdf]

**Appendix**  
**A Reliable, Feasible Method to Observe Neighborhoods at High Spatial Resolution**  
**Kepper et al.**

**Appendix Table 1.** Selected Street Segments for Observations by Land Use and Poverty-Level

| # of Street segments for observation | Land use         |                                       |                                                | Total |
|--------------------------------------|------------------|---------------------------------------|------------------------------------------------|-------|
|                                      | Residential only | ≥1 parcel= vacant /recreational/ park | ≥1 parcel= commercial, industrial, institution |       |
| High poverty <sup>a</sup>            | 7                | 6                                     | 10                                             | 23    |
| Medium poverty <sup>b</sup>          | 4                | 6                                     | 3                                              | 13    |
| Low poverty <sup>c</sup>             | 7                | 6                                     | 5                                              | 18    |
| Total                                | 18               | 18                                    | 18                                             | 54    |

<sup>a</sup> High poverty is defined as  $\geq 20\%$  of individuals within a census tract are below the poverty threshold

<sup>b</sup> Medium poverty is defined as between 10% and 20% of individuals within a census tract below the poverty threshold

<sup>c</sup> Low poverty is defined as less  $< 10\%$  of individuals within a census tract below the poverty threshold

**Appendix**  
**A Reliable, Feasible Method to Observe Neighborhoods at High Spatial Resolution**  
**Kepper et al.**

**Appendix Table 2.** Feasibility: Average Rating Time (Minutes) by Method and Source

| Observation level | Collection method |                                           |         | Difference between direct including travel time and virtual |
|-------------------|-------------------|-------------------------------------------|---------|-------------------------------------------------------------|
|                   | Direct            | Direct including travel time <sup>a</sup> | Virtual |                                                             |
| Parcel-level      | 16.1              | 34.9                                      | 21.4    | 13.5                                                        |
| Street-level      | 7.3               | 26.4                                      | 7.8     | 18.5                                                        |
| Difference        | 8.8               | 8.5                                       | 13.7    | 5.1                                                         |

*Notes:* Data is reported in minutes

<sup>a</sup> The average travel time for parcel-level ratings was 18.8 minutes and street-level was 19.1 minutes.
